# Supplementary material
Source: publisher figshare collection journal article supplement (https://karger.figshare.com/ndownloader/files/27777828)
Supplement: Supplementary file 1 [file 27777828]

| Groups | N | Patients |
| --- | --- | --- |
| Group 1 | 5 | *allergy- asthma-* (Control) |
| Group 2 | 6 | *allergy- asthma+* |
| Group 3 | 5 | *allergy+ asthma-* |
| Group 4 | 11 | *allergy+ asthma+* |

**Supplementary material**

**Table S1.** The groups of CRSwNP patients

| Level of infiltration | Score |
| --- | --- |
| < 10 cells/hpf | 1 |
| 10 - 24 cells/hpf | 2 |
| 25 - 39 cells/hpf | 3 |
| 40 - 54 cells/hpf | 4 |
| 55 - 69 cells/hpf | 5 |
| 70 – 84 cells/hpf | 6 |
| > 85 cells/hpf | 7 |

**Table S2.** Scoring system for eosinophil infiltration in NP tissue. The average score of 5 hpfs was used to determine eosinophil infiltration in tissue.


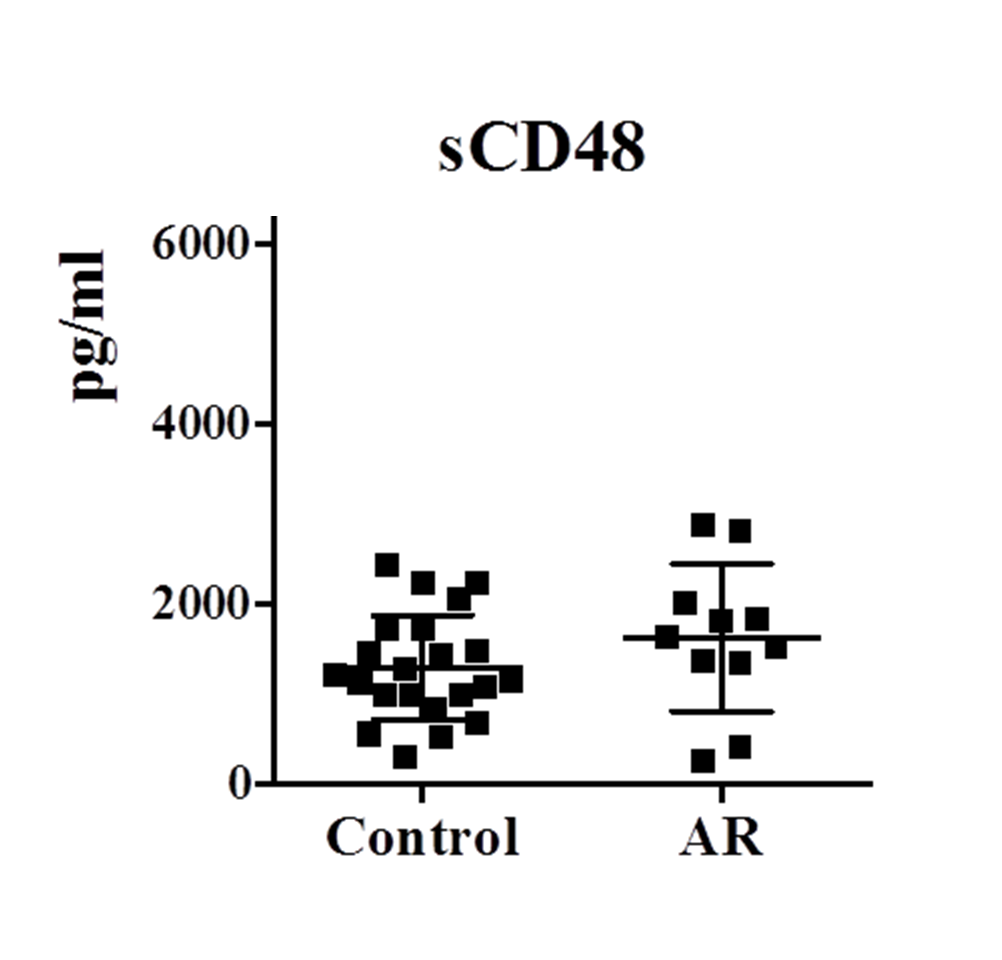


**A**

**B**


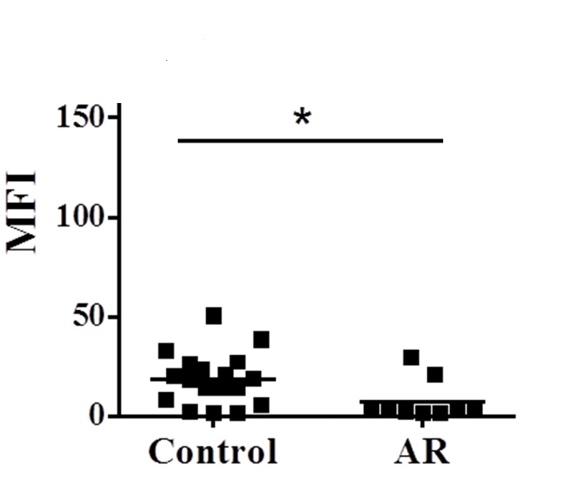


**mCD48**

**Figure S1 (Supplementary Figure 1)**


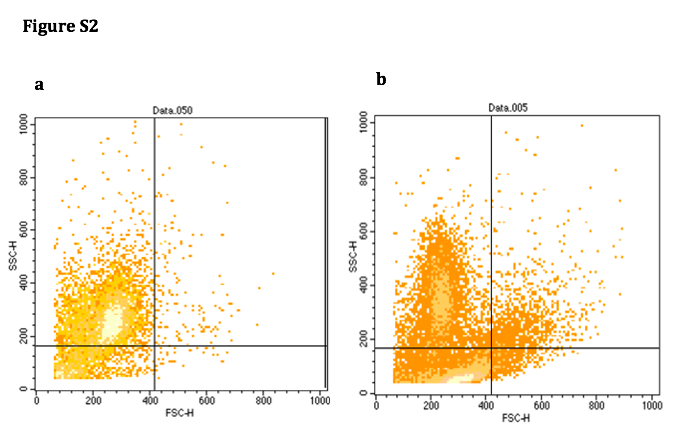


**Figure S2: Eosinophils obtained following human NP digestion**

After enzymatic digestion, nasal polyps were analyzed by FACS for physical

parameters and CCR3 staining. As expected, nasal polyp eosinophils were CCR3+, SSCHigh. Eosinophils from asthmatic nasal polyposis patients displayed higher SSC parameters. The data represents two out of nine nasal polyps that were analyzed. S2a: Non-asthmatic donor; S2b: Asthmatic donor.
